# Supplementary material for: Growing Pacific Linkage with the Interannual Variability of North Atlantic Explosive Cyclogenesis
Source: Research Square preprint supplement (doi:10.21203/rs.3.rs-1157480/v1), 2021-12-15
Supplement: Supplementary file 1 [file 878fa1593a981692299d97f1.docx]

Supporting Information for

**Growing pacific linkage with the interannual variability of North Atlantic explosive cyclogenesis**

**Jacob Stuivenvolt-Allen1, Simon S.-Y. Wang1,2, Yoshimitsu Chikamoto1, Jonathan D.D. Meyer1,2, Zachary F. Johnson3, Liping Deng4**

1Department of Plants, Soils, and Climate, Utah State University, Logan UT, United States

2Utah Climate Center, Utah State University, Logan UT, United States

3Department of Earth, Atmospheric, and Planetary Sciences, Purdue University, West Lafayette, IN, United States

4College of Ocean and Meteorology, Guangdong Ocean University, Zhanjiang 524088, Guangdong, China

**Contents of this file**

Figures S1-S3


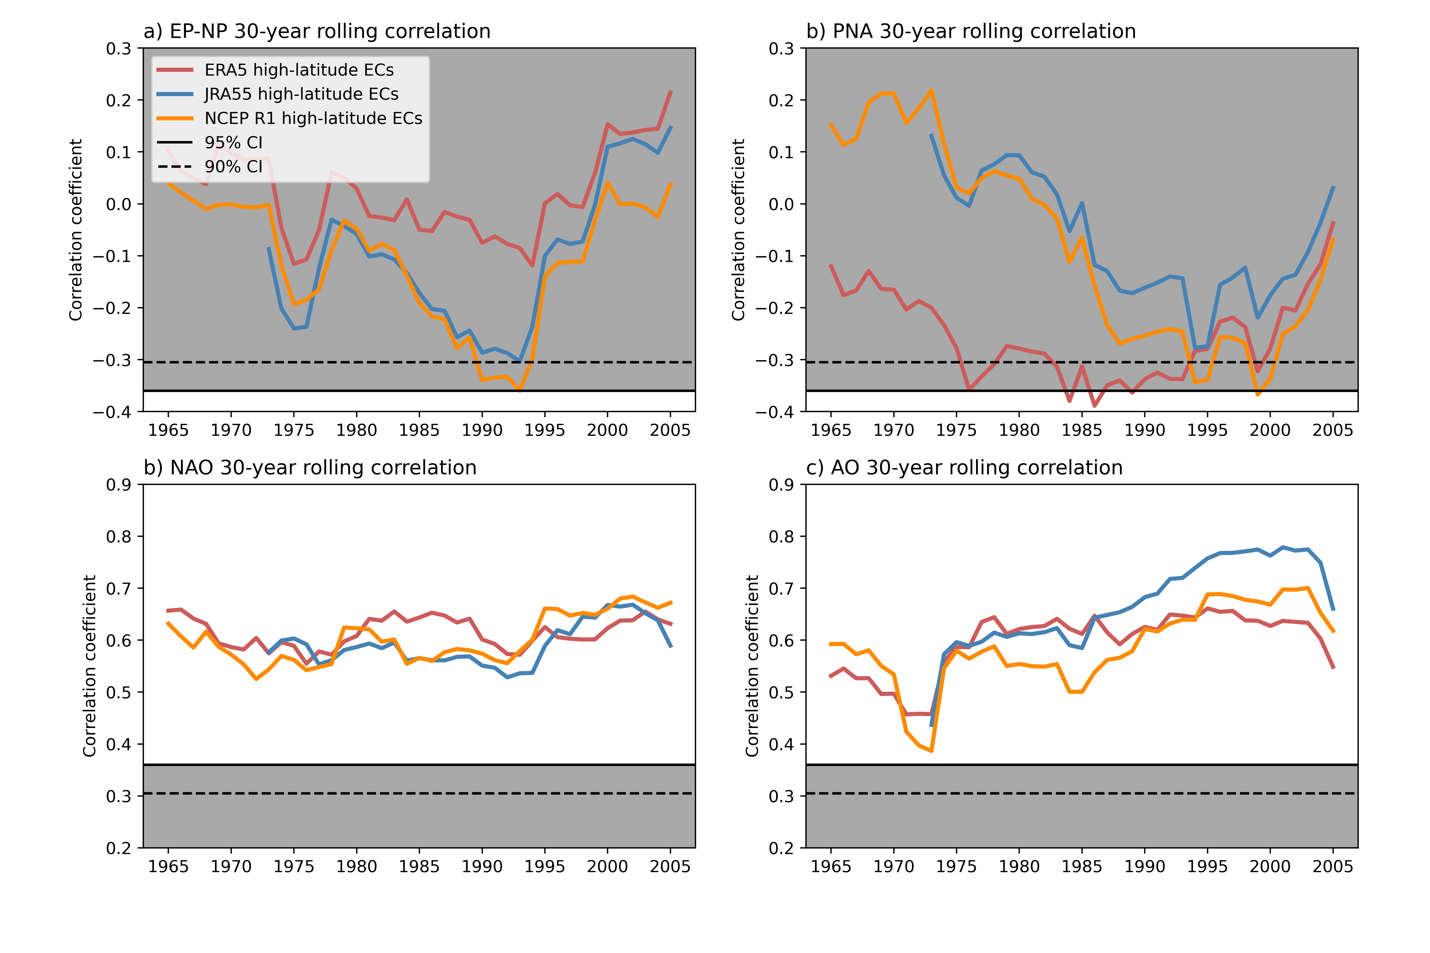


**Figure S1.** A 30-year rolling correlation between the November through March frequency of high-latitude ECs tracked in ERA5 (red line), JRA55 (blue line) and NCEP R1 (orange line) with the EP-NP (a), PNA (b), NAO (c), and AO teleconnection indices (d). The horizontal dotted line and solid line indicate the significance thresholds for 28 degrees of freedom for the 90% and 95% confidence interval respectively. Gray shading highlights the insignificant areas.


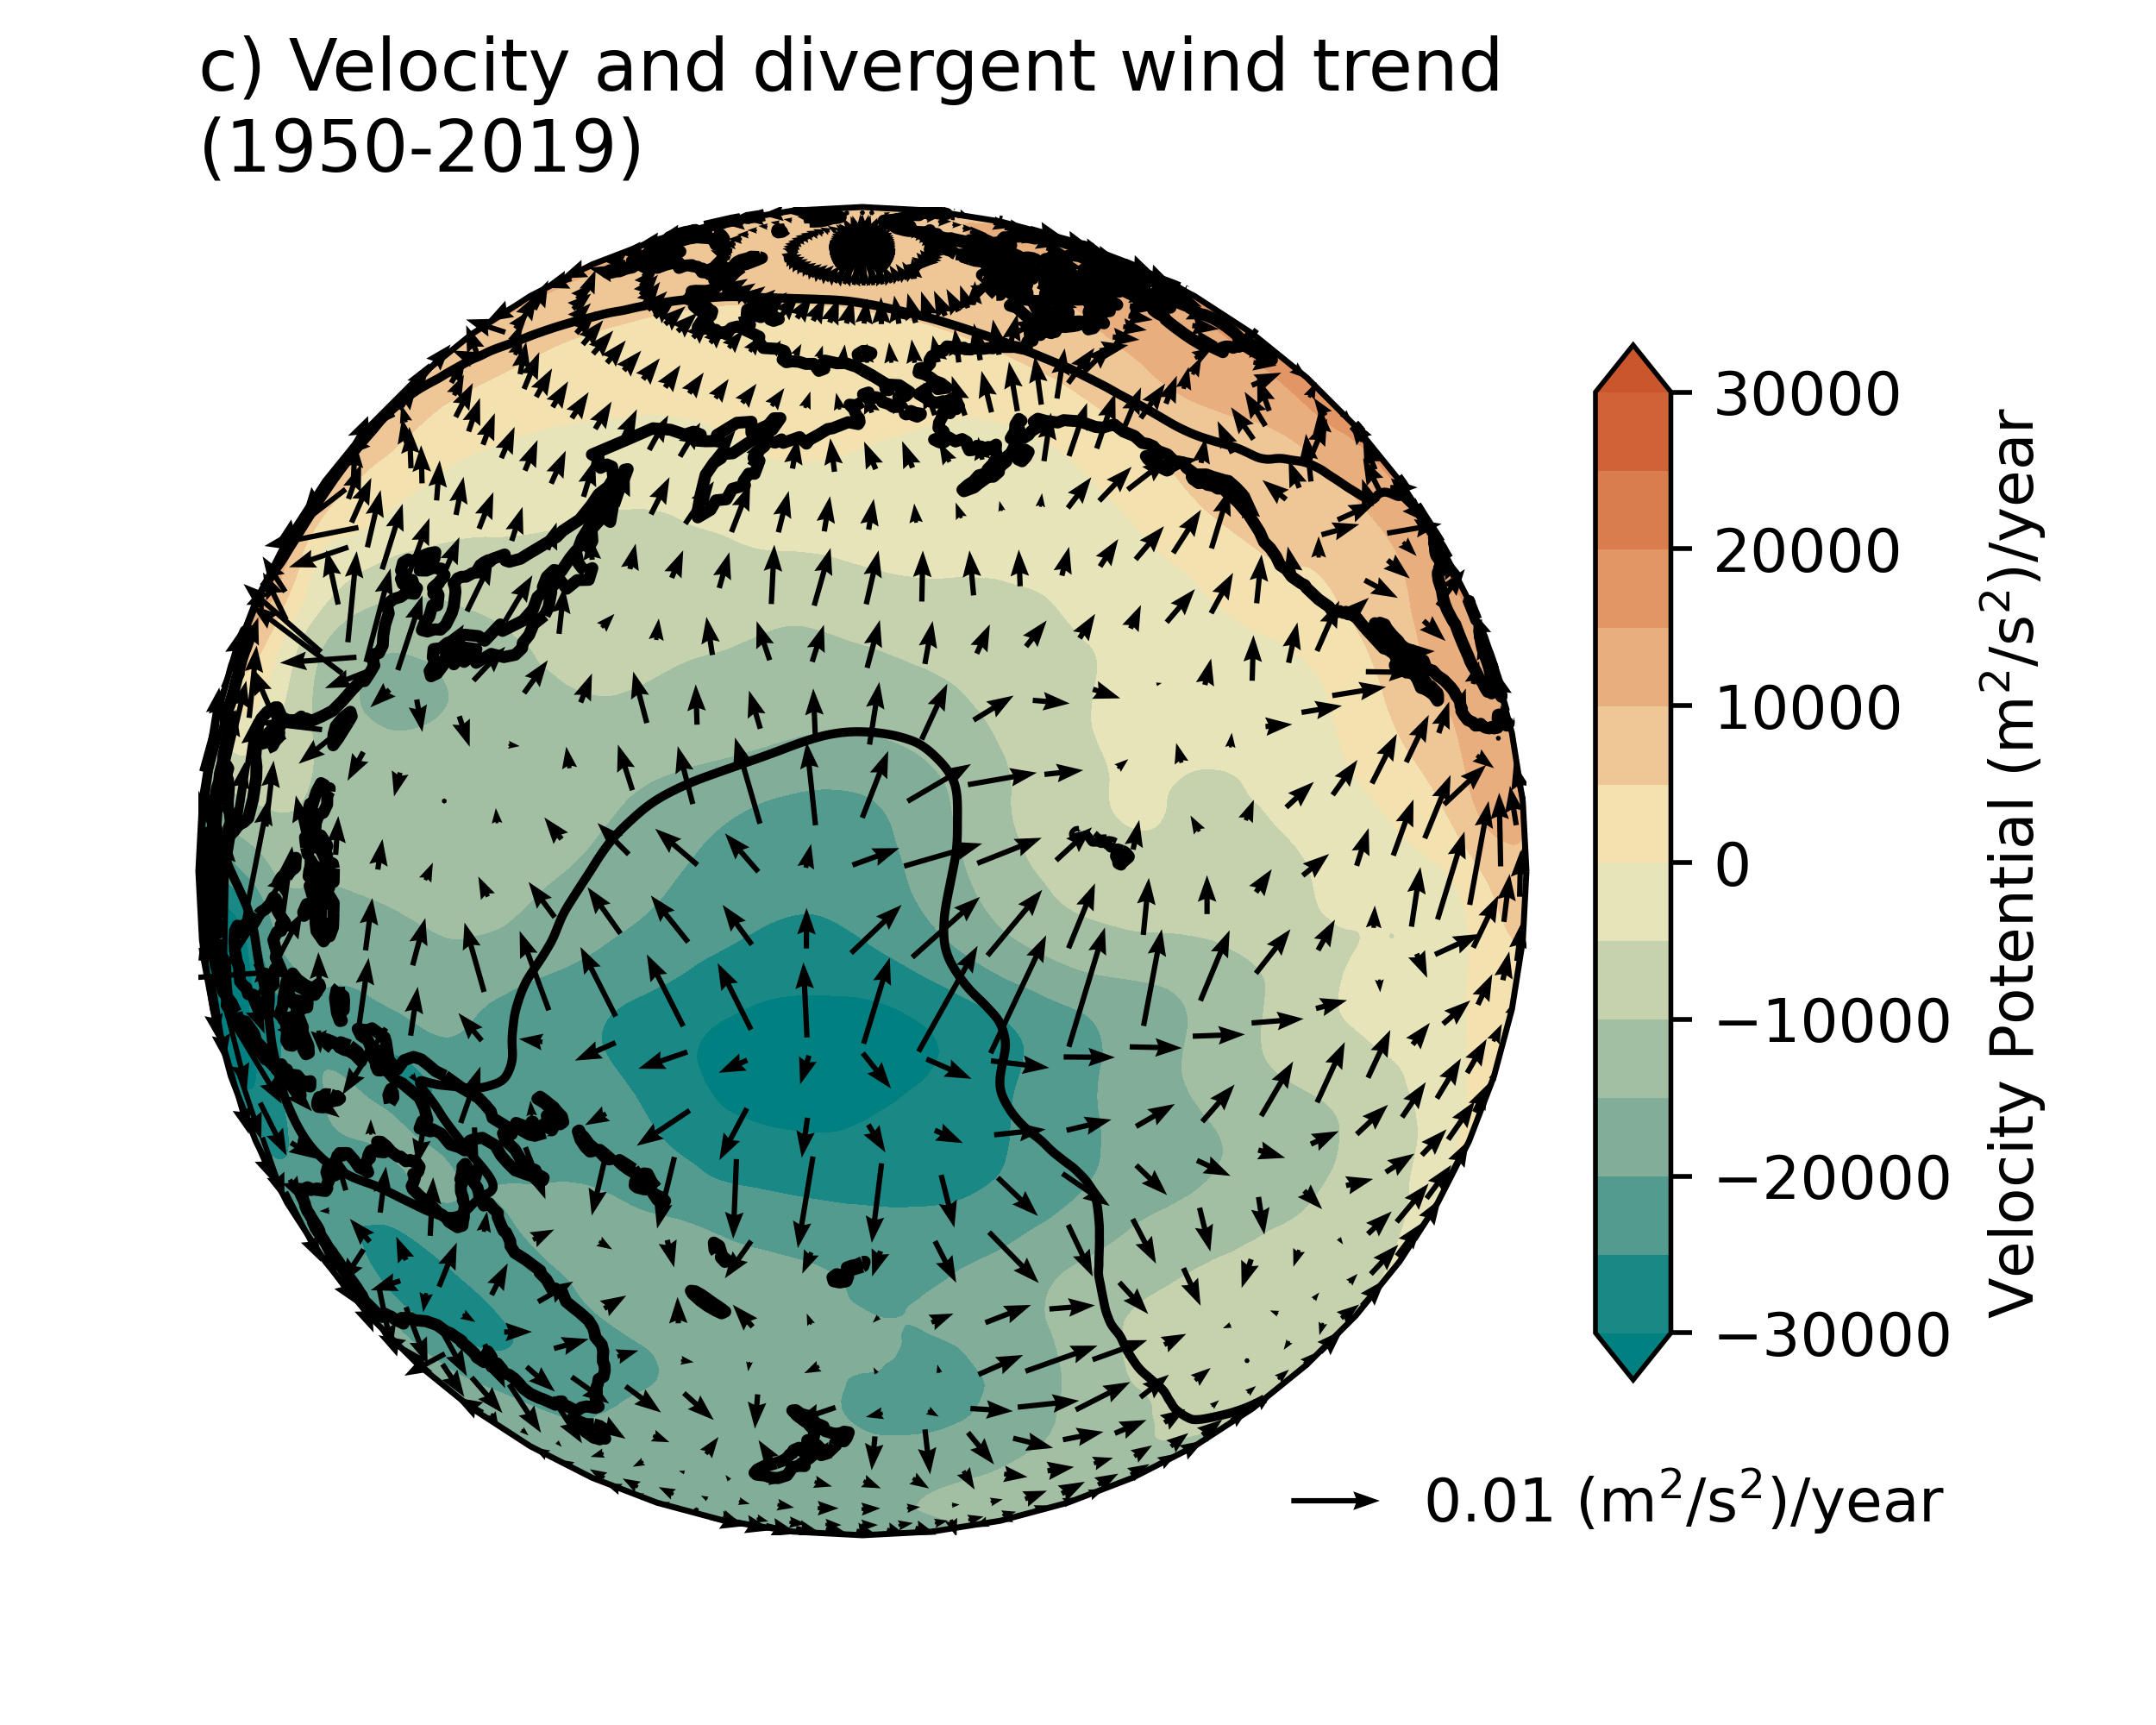

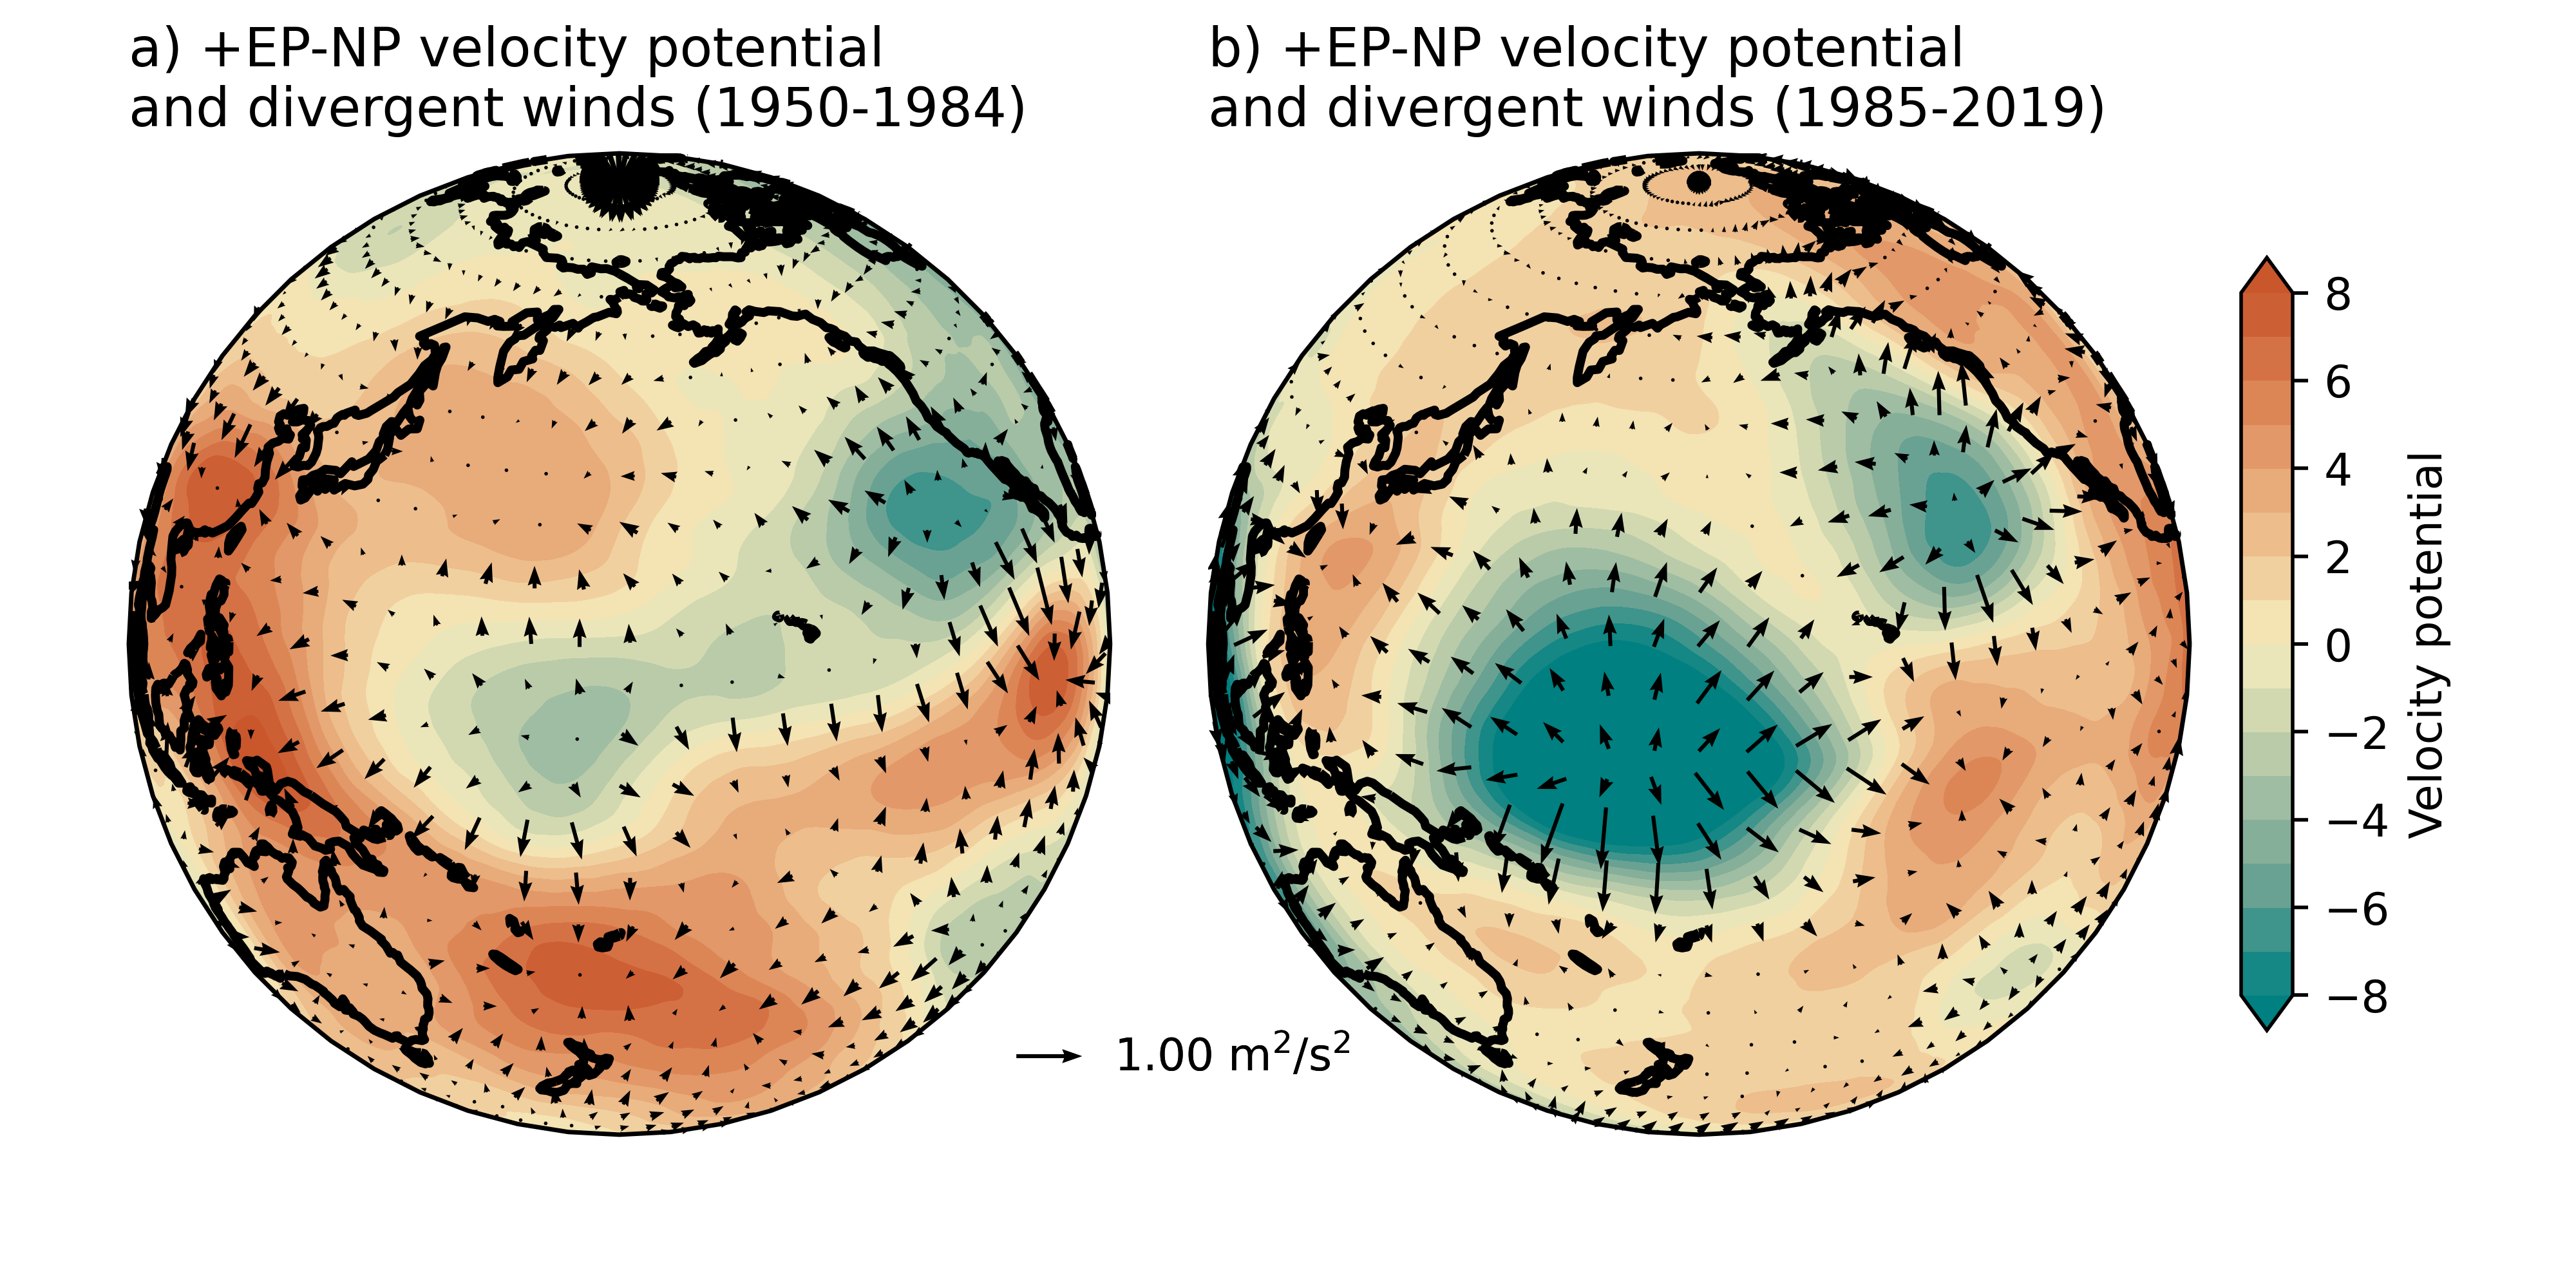


**Figure S2.** Velocity potential and irrotational winds at 250 hPa for the positive EP-NP from 1950 to 1985 (a) and 1985 to 2020 (b). Figure 8c shows the linear trend of velocity potential and irrotational winds. These plots are centered on 180° W, showing the north Pacific Ocean.


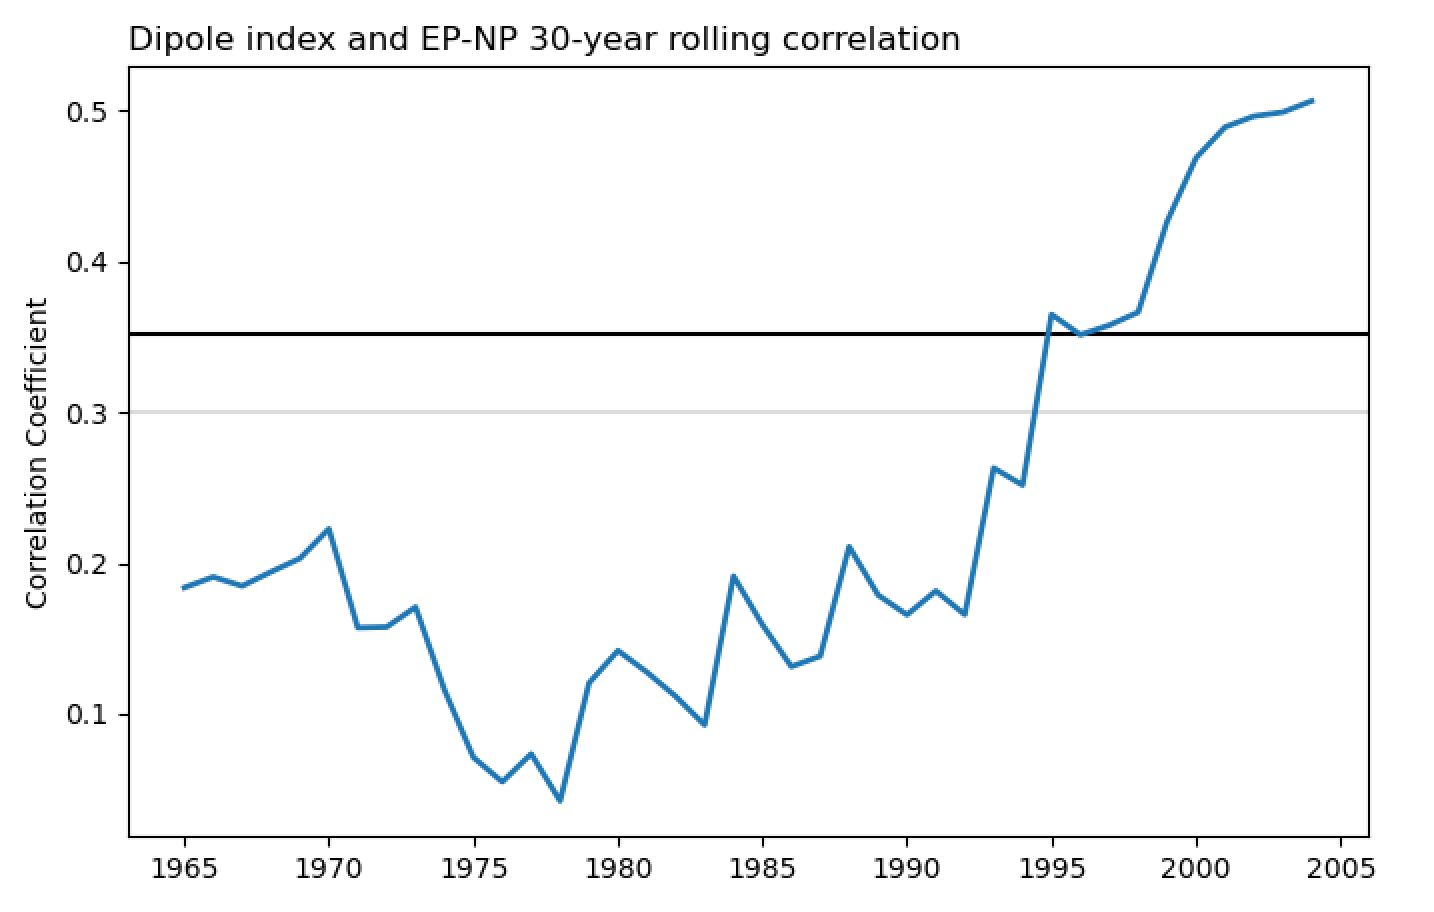


**Figure S3.** November through March “dipole-index” 30-year rolling correlation with the EP-NP index. The dipole index is calculated following Wang et al. (2015) by subtracting the monthly Z300 values between the ridge center (232.5-237.5°E & 47.5-52.5°N) from the trough center (282.5-287.5°E and 57.5-62.5°N) in NCEP R1. The horizontal black and gray lines indicate the 95% and 90% confidence intervals for 28 degrees of freedom.
